1 **Ant collective behavior is heritable and shaped by selection**

2

3 Justin T. Walsh<sup>1</sup>, Simon Garnier<sup>2</sup>, Timothy A. Linksvayer<sup>1</sup>

4

5 <sup>1</sup>Department of Biology, University of Pennsylvania, Philadelphia, PA 19104, USA

6 <sup>2</sup>Department of Biology, New Jersey Institute of Technology, Newark, NJ 07102, USA

7

8 \*corresponding author, email: [juswalsh@sas.upenn.edu](mailto:juswalsh@sas.upenn.edu)

9

10

11 **Abstract**

12 Collective behaviors are widespread in nature and usually assumed to be strongly shaped  
13 by natural selection. However, the degree to which variation in collective behavior is heritable  
14 and has fitness consequences -- the two prerequisites for evolution by natural selection -- is  
15 largely unknown. We used a new pharaoh ant (*Monomorium pharaonis*) mapping population to  
16 estimate the heritability, genetic correlations, and fitness consequences of three collective  
17 behaviors (foraging, aggression, and exploration) as well as body size, sex ratio, and caste ratio.  
18 Heritability estimates for the collective behaviors were moderate, ranging from 0.17 to 0.32, but  
19 lower than our estimates for the heritability of caste ratio, sex ratio, and the body size of new  
20 workers, queens, and males. Moreover, variation among colonies in collective behaviors was  
21 phenotypically correlated, suggesting that selection may shape multiple colony collective  
22 behaviors simultaneously. Finally, we found evidence for directional selection that was similar in  
23 strength to estimates of selection in natural populations. Altogether, our study begins to elucidate  
24 the genetic architecture of collective behavior and is one of the first studies to demonstrate that it  
25 is shaped by selection.

26 **Keywords:** Collective behavior, animal personality, genetic correlation, heritability, selection,  
27 caste ratio



## 29 **Introduction**

30           Collective behavior, defined as behaviors of groups of individuals that operate without  
31 central control (Gordon 2014, 2016), is ubiquitous in nature. Examples include predator  
32 avoidance in schools of fish, the migration of flocks of birds, and nest building in social insects.  
33 Increasingly, researchers have documented patterns of variation in collective behavior between  
34 groups (i.e. describing collective or group personality; Gordon 1991; Gordon et al. 2011; Jandt et  
35 al. 2014; Bengston & Jandt 2014; Wright et al. 2019) with a goal of understanding the  
36 evolutionary causes and consequences of variation in collective behavior. However, the degree to  
37 which collective behaviors are heritable and how genetic variation contributes to population-  
38 level variation in individual and collective behaviors remain largely unknown. Furthermore, it is  
39 often assumed that collective behavior and other group-level traits, like individual behavior and  
40 other individual-level traits, are strongly shaped by natural selection. However, little is actually  
41 known about the fitness consequences of variation in collective behaviors, or group-level traits  
42 more generally (Gordon 2013, 2016; Wright et al. 2019).

43           Given that trait variation must be heritable in order for the trait to respond to selection  
44 and evolve over time, quantifying heritability is a crucial first step in studying trait evolution  
45 (Falconer & Mackay 1996; Lynch & Walsh 1998). Previous studies in ants, honey bees, and  
46 sticklebacks suggest that collective behaviors and other group-level traits are heritable  
47 (Linksvayer 2006; Hunt et al. 2007; Wark et al. 2011; Gordon 2013; Greenwood et al. 2015;  
48 Friedman & Gordon 2016). Additionally, candidate gene studies have linked allelic variation to  
49 variation in collective behavior, providing further evidence that collective behavior is heritable  
50 (Krieger 2005; Wang et al. 2008; Wang et al. 2013; Tang et al. 2018). Although numerous  
51 studies have examined the genetic architecture of group-level traits in honey bees (Rinderer et al.

52 1983; Collins et al. 1984; Milne 1985; Moritz et al. 1987; Bienefeld & Pirchner 1990; Pirchner &  
53 Bienefeld 1991; Harris & Harbo 1999; Boecking et al. 2000; Hunt et al. 2007), we know little  
54 about the genetic architecture or the evolution of collective behavior and other group-level traits  
55 in other group-living species.

56 Another key factor affecting the relationship between genotype, phenotype, and  
57 evolutionary response to selection is the pattern of genetic correlations, i.e. the proportion of  
58 variance that two traits share due to genetic causes. Genetic correlations can either accelerate or  
59 slow down the rate of evolutionary response to selection, depending on the direction of the  
60 correlation relative to the direction of selection on the traits (Lynch & Walsh 1998; Wilson et al.  
61 2010). Understanding genetic correlations is especially important for the study of behavioral  
62 evolution since behaviors are often thought to be correlated with each other, forming sets of  
63 tightly linked traits that are often described as behavioral syndromes (Sih et al. 2004;  
64 Dochtermann & Dingemanse 2013). Although genetic correlations have been estimated for  
65 individual-level behaviors (reviewed by van Oers et al. 2005), few studies have examined  
66 genetic correlations between collective behaviors or other group-level traits in social insects  
67 (except for honey bees; Milne 1985; Bienefeld & Pirchner 1990; Boecking et al. 2000).

68 The genetic architecture of group-level traits such as collective behavior is likely more  
69 complex than the genetic architecture of individual-level traits, because variation in group-level  
70 traits arises from phenotypic and genotypic variation within and among groups (Linksvayer  
71 2006, 2015; Bijma et al. 2007a, 2007b; McGlothlin et al. 2010; Gempe et al. 2012). For example,  
72 the genotype of each individual may influence its activity rate, which in turn may affect  
73 interactions among group members and the collective performance of the group. Thus, group-  
74 level traits depend on the genotypes of multiple interacting individuals, just as individual-level

75 traits that are affected by social interactions, as considered in the interacting phenotypes  
76 framework (Moore et al. 1997; McGlothlin et al. 2010). Indeed, previous honey bee studies  
77 quantifying heritability for colony-level performance traits such as honey yield have treated  
78 colony performance as a worker trait that is influenced by the expected genotype of workers and  
79 also potentially influenced by the genotype of the queen (i.e. through a maternal genetic effect)  
80 (Bienefeld and Pirchner 1990; Bienefeld and Pirchner 1991; Bienefeld et al. 2007; Brascamp et  
81 al. 2016).

82         The rate and direction of a trait's potential evolutionary response to selection also  
83 depends on the pattern of natural selection acting on the trait. Knowledge of the fitness  
84 consequences of trait variation allows researchers to characterize the type (e.g., directional,  
85 stabilizing, or disruptive) and strength of natural selection acting on a trait (Lande & Arnold  
86 1983; Arnold & Wade 1984; Janzen & Stern 1998; Morrissey & Sakrejda 2013). Many studies  
87 have estimated the fitness consequences of individual-level behavioral variation (reviewed by  
88 Smith & Blumstein 2008), but the consequences of group-level variation have received relatively  
89 little attention (but see Wray et al. 2011; Modlmeier et al. 2012; Gordon 2013; Blight et al.  
90 2016a; Blight et al. 2016b).

91         Social insects are well-established models for studying collective behavior. Well-studied  
92 collective behaviors include nest choice in acorn ants (*Temnothorax* spp.; Möglich 1978; Franks  
93 et al. 2003; Pratt 2017), nest defense and hygienic behavior in honey bees (*Apis mellifera*;  
94 Spivak 1996; Breed et al. 2004; Evans & Spivak 2010), and the regulation of foraging in pharaoh  
95 ants (*Monomorium pharaonis*; e.g. Beekman et al. 2001; Sumpter & Beekman 2003; Robinson et  
96 al. 2005) and harvester ants (*Pogonomyrmex barbatus*; e.g. Gordon 2002; Greene & Gordon  
97 2007; Gordon et al. 2007; Gordon et al. 2011; Gordon 2013). The collective behavior of colony

98 members also shapes colony productivity and the relative investment in workers versus  
99 reproductives (i.e. caste ratio) and reproductive males versus queens (i.e. sex ratio). Social insect  
100 sex ratio and caste ratio have long served as important models for empirically testing predictions  
101 from inclusive fitness theory regarding predicted conflicts between queens and workers over sex  
102 ratio and caste ratio (Trivers & Hare 1976; Reuter & Keller 2001; Mehdiabadi et al. 2003;  
103 Linksvayer 2008; Bourke 2015;). However, despite this long-term intense interest in the  
104 evolution of colony-level traits, empirical evidence is scarce about the key parameters governing  
105 the evolution of these traits, especially for ants. Indeed, while recent molecular studies have  
106 begun to characterize the genomic, transcriptomic, and epigenetic differences between species,  
107 between castes within a species, and between individual workers (Friedman & Gordon 2016;  
108 Gospocic et al. 2017; Warner et al. 2017; Chandra et al. 2018; Walsh et al. 2018), little is known  
109 about the genetic architecture of collective behavior, caste ratio, and sex ratio (Linksvayer 2006).  
110 Similarly, while it is clear that colony-level phenotypes can be shaped by patterns of selection  
111 within- and between-colonies (Owen 1986; Moritz 1989; Ratnieks & Reeve 1992; Tsuji 1994,  
112 1995; Banschbach & Herbers 1996; Tarpay et al. 2004; Gordon 2013), few studies have attempted  
113 to empirically quantify patterns of selection acting on social insect traits.

114 In this study we used a genetically and phenotypically variable laboratory population of  
115 pharaoh ants (*Monomorium pharaonis*). Such a mapping population has proven powerful to  
116 elucidate the genetic architecture of a range of traits, including behavioral traits, in mice, rats,  
117 and fruit flies (Hansen & Spuhler 1984; Mott et al. 2000; Valdar et al. 2006; King et al. 2012).  
118 We first assayed colony-level foraging, aggression, and three measures of exploration using three  
119 replicate sub-colonies of 81 distinct colony genotypes of known pedigree (243 replicate sub-  
120 colonies total). Collective behaviors are defined as emergent behaviors of groups of individuals

121 that operate without central control, through local interactions (Gordon 2014, 2016). We  
122 consider the behaviors of foraging, exploration, and aggression to be collective because all three  
123 consist of emergent patterns of workers operating at least in part through local interactions, either  
124 through direct antennal contact with other workers or through the influence of pheromones  
125 (Adler & Gordon 1992; Gordon & Mehdiabadi 1999; Gordon 2002, 2010; Greene & Gordon  
126 2007; Pinter-Wollman et al. 2013; Kleineidam et al. 2017). In many social insects, foragers are  
127 stimulated to begin foraging through interactions with other foragers/scouts returning to the nest  
128 (e.g. Gordon 2002; Fernandez et al. 2003; Pinter-Wollman et al. 2013). Both foraging and  
129 exploratory behavior are often regulated through the use of trail pheromones (e.g. Fourcassie &  
130 Deneubourg 1994; Jackson & Châline 2007). During aggressive responses to threats, workers are  
131 often recruited via the use of alarm pheromones (Loftqvist 1976; Blum 1996) or through social  
132 interactions with other workers (Kleineidam et al. 2017). We also chose these collective  
133 behaviors because they are linked to colony success in other social insects, including other  
134 species of ants (Wray et al. 2011; Modlmeier et al. 2012; Blight et al. 2016a; Blight et al. 2016b).  
135 Furthermore, we measured colony productivity, caste and sex ratio, and worker, gyne, and male  
136 body size. We used the known pedigree of colonies in our mapping population, together with  
137 trait measurements in an animal model framework, to estimate the heritability of and genetic  
138 correlations between all traits. Finally, we estimated the strength and pattern of selection acting  
139 on all the measured phenotypes in the laboratory.

140

## 141 **Materials and Methods**

### 142 **(a) Background and overall design**

143 All *M. pharaonis* colonies used in this study were reared in the lab and derived from  
144 eight initial lab stocks, collected from eight different locations across Africa, Asia, Europe, and  
145 North America (Schmidt 2010; Schmidt et al. 2010). Specifically, the eight initial stocks were  
146 systematically intercrossed for nine generations in order to create a mapping population that was  
147 initially designed to be analogous to the mouse heterogeneous stock (Mott et al. 2000; Valdar et  
148 al. 2006). After nine generations of intercrossing, each colony in the resulting mapping  
149 population is expected to contain a unique mixture of alleles from the eight initial stocks  
150 (Pontieri et al. 2017) (**Supplemental figure 1**). We maintained all colonies at  $27 \pm 1$  °C and 50%  
151 relative humidity on a 12:12 hour light:dark cycle. We split each colony (henceforth “colony  
152 genotype”) into three equally-sized replicates (henceforth “colony replicate”) by emptying the  
153 colony genotypes into plastic bowls, gently mixing the queens, workers, and brood, and using tea  
154 spoons to scoop them into three new colony containers. Next, we manually counted all  
155 individuals within the colony replicates and adjusted the numbers accordingly so that all colony  
156 replicates initially consisted of 4 queens,  $400 \pm 40$  workers,  $60 \pm 6$  eggs,  $50 \pm 5$  first instar larvae,  
157  $20 \pm 2$  second instar larvae,  $70 \pm 7$  third instar larvae,  $20 \pm 2$  prepupae, and  $60 \pm 6$  worker pupae.  
158 These numbers represent a typical distribution of developmental stages in a relatively small *M.*  
159 *pharaonis* colony (Warner et al. 2018). Except when starving the colony replicates (see below),  
160 we fed all colony replicates twice per week with an agar-based synthetic diet (Dussutour &  
161 Simpson 2008) and dried mealworms. The colony replicates always had access to water via  
162 water tubes plugged with cotton and nested between two glass slides (5 cm x 10 cm). We kept all  
163 colony replicates in a plastic colony container (18.5 cm x 10.5 cm x 10.5 cm) lined with flulon  
164 and surrounded by a moat of oil to prevent the workers from escaping the box.



165           After setting up the colony replicates, we gave them two weeks to acclimate to the new  
166 conditions before conducting behavioral assays. We fed the colony replicates twice per week  
167 except for the week prior to the exploratory and foraging assays during which we starved the  
168 colony replicates so that they would be motivated to explore and forage. We conducted the  
169 exploratory and foraging assays during the third week and the aggression assays during the  
170 fourth week after setting up the replicate colonies.

## 171 **(b) Behavioral observations**

### 172 **(i) Exploratory assay**

173           We conducted the exploratory assay after the colony replicates had been starved for six  
174 days. We assayed the exploratory behavior of both entire colony replicates and groups of five  
175 foragers. We conducted the assay inside a filming box with white LED lights arranged along the  
176 walls and a camera mounted on the top to film the arena from above (**Supplemental figure 2A**).  
177 To remove trail pheromones between assays, we covered the floor of the box with white poster  
178 board that we replaced between each assay. We first collected five foragers, defined as any  
179 worker outside the nest, from inside the colony container and placed them in a large petri dish.  
180 We placed the petri dish upside-down in the middle of a circular arena in the center of the  
181 filming box and waited five minutes to give the workers time to settle down after being handled.  
182 After the five minutes, we gently removed the petri dish so the workers were free to move  
183 around the arena and filmed the workers exploring the arena for 15 minutes.

184           Next, we replaced the poster board inside the filming box and placed the five foragers, all  
185 remaining foragers from inside the colony container, and the nest containing the rest of the  
186 workers, queens, and brood inside a petri dish. We placed the petri dish containing the entire

187 colony upside-down in the center of the arena and waited five minutes before lifting the petri  
188 dish and filming for 15 minutes.

189 We analyzed the videos of the five foragers using custom made tracking software  
190 (<https://github.com/swarm-lab/trackR>; accessed 2017) to track the location of each ant in each  
191 frame of the video. To avoid the effect of the arena wall on ant trajectories, we removed all  
192 tracks where the ants were within 3 mm of the wall, resulting in many separate trajectories  
193 within each video for each ant. Next, for each sub-trajectory, we calculated the net squared  
194 displacement (NSD) by taking the square of the distance traveled by each ant between the  
195 starting location and each successive location along the rest of the trajectory. To calculate the  
196 diffusion coefficient, we took the slope of the plot of NSD over time and fit the equation:

$$197 \quad MSD = 4Dt$$

198 where mean squared displacement ( $MSD$ ) is the slope of NSD over time,  $D$  is the diffusion  
199 coefficient, and  $t$  is time (Börger & Fryxell 2012). The diffusion coefficient served as a measure  
200 of how quickly the ants collectively explored a novel space.

201 In addition, for both the five forager and entire colony videos, we calculated the arena  
202 coverage and coverage redundancy over time. First, we computed the absolute difference  
203 between each frame of the recorded video and a background image of the experimental setup  
204 without ants in it. When a pixel had a large absolute difference, it meant an ant was present on  
205 that pixel in a given frame. We then applied a threshold to the difference image and classified all  
206 the pixels with a difference value above the threshold as “ant-covered” pixels and gave them a  
207 value of 1, and all the pixels with a difference value below the threshold as “background” pixels  
208 and gave them a value of 0. Finally, we computed the cumulative sum of the segmented images  
209 over time and calculated for each of them the arena coverage as the percentage of the pixels with

210 a value of at least 1 (i.e. what fraction of pixels have been visited by ants at least once; **Figure**  
211 **1**).

212 We will refer to three exploratory behaviors as “exploratory rate”, “group exploration”,  
213 and “colony exploration”. “Exploratory rate” refers to the diffusion coefficient of groups of five  
214 ants, “group exploration” to the percent of the arena covered by the groups of five foragers, and  
215 “colony exploration” to the percent of the arena covered by the entire colony.

### 216 **(ii) Foraging assay**

217 We conducted the foraging assay on each colony replicate the day after the exploratory  
218 assay and after the colony replicates had been starved for a week. We melted the agar-based  
219 synthetic diet and soaked a cotton ball in the liquid. When the cotton ball solidified, we placed it  
220 on the plateau of a 3D printed ramp and placed the ramp inside a colony container on the  
221 opposite site of the nest (**Supplemental figure 2B**). Once an ant first discovered the food, we  
222 started filming and filmed for one hour. If no ant discovered the food in 30 minutes, we started  
223 the recording. We calculated the foraging rate by manually counting the number of ant visits to  
224 the plateau of the ramp in each video. Because many ants went back and forth from the food to  
225 the nest, we counted many ants more than once.

### 226 **(iii) Aggression assay**

227 Like other unicolonial ant species, *M. pharaonis* workers show little to no aggression  
228 towards *M. pharaonis* workers from other colonies (Schmidt et al. 2010). To get *M. pharaonis*  
229 workers to act aggressively, and to be able to quantify aggression against a constant “enemy” for  
230 all of our experimental colonies, we used workers from a single *Monomorium dichroum* colony  
231 that had been kept in the lab under the same conditions as the *M. pharaonis* colonies for 5 years.  
232 We conducted the aggression assays a week after the foraging assays. We first collected twenty

233 foragers of both species and placed them in separate small petri dishes (**Supplemental figure 3**).  
234 We placed both small petri dishes upside down in a large petri dish for five minutes before lifting  
235 both petri dishes and allowing the workers of both species to interact. Every 5 minutes for one  
236 hour, we manually counted and recorded the number of *M. pharaonis* workers that were biting  
237 *M. dichroum* workers. We defined aggression as the average number of *M. pharaonis* workers  
238 biting *M. dichroum* workers across all observations within an hour. We froze all of the ants used  
239 in the aggression assay so that we did not reuse *M. dichroum* workers in more than one assay.

#### 240 **(c) Colony productivity and body mass measurements**

241 As a measure of colony productivity, we surveyed each colony replicate once per week  
242 and counted the number of workers and brood at all developmental stages. *M. pharonis* colonies  
243 usually only produce new gynes (virgin queens) and males in the absence of fertile queens  
244 (Edwards 1991; Warner et al. 2018). Therefore, in order to induce the production of new gynes  
245 and males, we removed queens at the start of the fifth week, after the aggression assay. We  
246 conducted weekly surveys until all brood matured into worker, gyne, or male pupae. In addition  
247 to colony productivity data for the total number of workers, gynes, and males produced, the  
248 weekly surveys also allowed us to calculate colony caste and sex ratio. We defined caste ratio as  
249 the number of gynes relative to the total number of females produced, and sex ratio as the  
250 number of gynes relative to the total number of reproductives (gynes and males) produced. To  
251 measure body size, we collected 15 worker pupae, 10 gyne pupae, and 10 male pupae from each  
252 colony replicate. We dried the pupae out in a drying oven for 24 hours before weighing.

#### 253 **(d) Heritability and genetic correlation analysis**

254 We performed all statistical analyses in R version 3.4.1 (R Core Team 2014). We  
255 estimated the repeatability of all measured phenotypes across colony replicates using a

256 generalized linear mixed model (GLMM) approach in the R package MCMCglmm (Hadfield  
257 2010). We included block as a random factor to account for the fact that the samples were  
258 collected at different time points from the replicate colonies and included colony identity as a  
259 random effect and *Wolbachia* infection status as a fixed effect (two of the original eight lineages  
260 included in the heterogeneous stock were infected with *Wolbachia*; Schmidt et al. 2010, Pontieri  
261 et al. 2017).

262 To estimate the heritability of, and genetic correlations between, all measured  
263 phenotypes, we used an animal model approach. Animal models estimate genetic parameters of  
264 traits by evaluating how patterns of observed phenotypic covariance between all pairs of  
265 individual “animals” is predicted by the expected genetic relatedness between individuals, based  
266 on pedigree (Kruuk 2004, de Villemereuil 2012). For our study, “individual animals” were  
267 replicate colonies, the pedigree was the known pedigree across nine generations of the *M.*  
268 *pharaonis* colonies in our mapping population, and the pedigree specifically represented  
269 genealogical relationships among the workers (i.e. the worker offspring of queen and male  
270 parents) that make up the replicate colonies of the mapping population. We thus assessed the  
271 degree to which the expected genotype of workers predicted the observed collective behavior or  
272 group-level phenotype measured for groups of workers from replicate colonies. Note that while  
273 we focused only on how expected worker genotype was associated with variation in worker  
274 collective behavior and colony-level traits, it is certainly possible that the genotypes of other  
275 types of colony members (i.e. queens or sibling larvae) also contributes to variation in the group-  
276 level traits we measured. Such effects can be independently estimated as described above, if very  
277 large datasets are available (e.g., Brascamp et al. 2016 used a honey bee dataset with 15,000  
278 colonies), or alternatively, these effects can be experimentally teased apart with cross-fostering

279 (Linksvayer 2006, 2007, Linksvayer et al. 2009). However, we did not have enough power in our  
280 dataset to separately estimate potential queen genetic effects, and effects of larval genotype are  
281 always completely confounded with worker genotype barring experimental cross-fostering.

282 Specifically, we used the R package MCMCglmm to run animal models using a Bayesian  
283 Markov chain Monte Carlo (MCMC) approach (de Villemereuil 2012). We accounted for the  
284 fact that ants are haplodiploid (males are haploid, females are diploid) by constructing the  
285 pedigree as if the traits were all sex-linked (Hedrick & Parker 1997). We used weakly  
286 informative priors for 1,000,000 iterations, with a burn-in period of 10,000 iterations and stored  
287 estimates every 500 iterations (full R script included in supplemental material; following de  
288 Villemereuil 2012). We assessed convergence of the models by visually inspecting estimate plots  
289 and assessing the autocorrelation values (de Villemereuil 2012). We analyzed whether behaviors  
290 were phenotypically correlated with each other (i.e. behavioral syndromes) using Spearman rank  
291 correlations and corrected for multiple comparisons by using the “FDR” method in the R  
292 function “p.adjust.”

293 In our initial heritability estimates, we ignored two complications in our pedigree. First,  
294 between our conducting new crosses to produce new generations, our colonies went through  
295 multiple rounds of intranidal mating: when the fecundity of current queens declines, *M.*  
296 *pharaonis* colonies produce new gynes and males which stay in the nest and mate with each  
297 other (Berndt & Eichler 1987). Second, when a colony was the mother/father colony to multiple  
298 offspring colonies, we initially treated those offspring colonies as half siblings. However,  
299 because *M. pharaonis* colonies contain multiple queens, the new gynes and males they produce  
300 may be better thought of as cousins. To test whether either of these complications would affect  
301 our heritability estimates, we constructed multiple pedigrees and re-ran the heritability analyses.

302 We constructed pedigrees in which one or two generations contained two rounds of intranidal  
303 mating, one or two generations considered reproductives from the same colony as cousins, and  
304 two generations of both intranidal mating and considering reproductives from the same colony as  
305 cousins.

#### 306 **(e) Selection analysis**

307 We defined fitness in two ways, as either the production of new reproductives (gynes or  
308 males) or new workers, and ran separate models for each fitness definition. In nature, *M.*  
309 *pharaonis* colonies reproduce by budding (i.e. new colonies are not founded independently by  
310 queens; Buczkowski & Bennett 2009), but instead, a number of queens and workers disperse  
311 with brood to form a new colony. Both new reproductives and new workers determine the  
312 growth rate and potential to bud for existing colonies, and hence are appropriate measures of  
313 colony fitness. We estimated the strength of selection using a multivariate standardized selection  
314 gradient approach as described by Morrissey & Sakrejda (2013). This method is similar to the  
315 approach outlined by Lande and Arnold (1983) and uses spline-based generalized additive  
316 models to model the relationship between fitness and traits. We normalized all behaviors to a  
317 mean of zero and a standard deviation of one so that the selection estimates represent  
318 standardized values (Lande & Arnold 1983; Morrissey & Sakrejda 2013). We included all five  
319 behaviors and block in all models and estimated selection gradients and prediction intervals after  
320 1000 bootstrap replicates (Morrissey & Sakrejda 2013).

321

## 322 **Results**

### 323 **(a) Repeatability and heritability estimates**

324 All five behaviors, caste and sex ratio, and worker, gyne, and male body mass were  
325 significantly repeatable across replicate colonies (**Supplemental table 1**). We estimated the  
326 heritability of the five collective behaviors to be between 0.17 and 0.32, with a median value of  
327 0.21 (**Figure 2**). We estimated the heritability of worker body mass to be 0.34, gyne body mass  
328 to be 0.46, and male body mass to be 0.53 (**Figure 2**). We estimated the heritability of five  
329 colony productivity measures to be between 0.001 and 0.46, with a median value of 0.24 (**Figure**  
330 **2**). Finally, we estimated the heritability of colony caste and sex ratio to be 0.26 and 0.23,  
331 respectively (**Figure 2**).

332 We compared our initial heritability estimates with heritability estimates using five  
333 different modified pedigrees that considered intranidal mating and/or considering offspring  
334 colonies as cousins rather than half siblings. The difference between the initial heritability  
335 estimates and the estimates when using the five modified pedigrees were small, less than 0.1 for  
336 all phenotypes except sex ratio, which differed by up to 0.24 (**Supplemental table 2**).

337

### 338 **(b) Phenotypic and genetic correlation estimates**

339 We found phenotypic correlations among the five measured collective behaviors (**Figure**  
340 **3**). Foraging rate was negatively correlated with aggression and positively correlated with both  
341 group exploration and colony exploration. Aggression was negatively correlated with  
342 exploratory rate. Group exploration and colony exploration were positively correlated. The  
343 genetic correlation estimates ranged from -0.05 to 0.17 but the 95% CIs all overlapped with zero  
344 (see **Figure 3** and **Supplemental table 3** for estimates and 95% CI). The genetic correlation  
345 estimates between behaviors and all other traits, as well as among all the other traits, were mostly  
346 small and all had 95% CI that overlapped with zero (**Supplemental table 4**).



347

348 **(c) Selection gradients**

349           When defining fitness as the number of reproductives (gynes + males) produced by the  
350 colony, we found evidence for positive linear selection on foraging and negative linear selection  
351 on exploratory rate (**Table 1, Figure 4**). We found no evidence for quadratic selection. When  
352 defining fitness as the number of workers produced by a colony, we found evidence for positive  
353 linear selection on foraging and no evidence for quadratic selection (**Table 1, Figure 4**). When  
354 defining fitness as either the production of new reproductives or workers, we found no evidence  
355 for correlational selection between any of the five behaviors. Finally, we found no evidence for  
356 linear or quadratic selection on worker, gyne, or male body mass (**Supplemental table 5**).

357           To further put our results into context, we estimated the proportion of variance among  
358 our colonies for both measures of fitness (the productions of new reproductives and workers) that  
359 was explained by variation in any of our five behavioral variables, experimental block, or  
360 *Wolbachia* infection status. For the production of new reproductives, we found that aggression  
361 explained the largest amount of the variance (5.29%), followed by foraging (2.29%), group  
362 exploration (1.94%), exploratory rate (0.52%), and colony exploration (0.33%) (**Supplemental**  
363 **table 6**). For the production of new workers, we found that foraging explained the largest  
364 amount of the variance (1.29%), followed by aggression (0.53%), colony exploration (0.34%),  
365 group exploration (0.27%), and exploratory rate (0.08%) (**Supplemental table 6**).

366

367 **Discussion**

368           Collective behavior is ubiquitous in nature and presumed to have strong fitness  
369 consequences for group members. Moreover, repeatable variation in collective behavior (often

370 described as collective or group-level “personality”) has been commonly observed (Bengston &  
371 Jandt 2014; Planas-Sitjà et al. 2015; Jolles et al. 2017; Wright et al. 2019). However, little is  
372 known about the heritability or genetic architecture of collective behavior and how collective  
373 behavior is shaped by selection. A major difficulty for elucidating the genetic basis of collective  
374 behavior is that, unlike individual-level behavior, collective behavior by definition depends on  
375 social interactions among members of the group. As a result, the genetic architecture of  
376 collective behavior fundamentally depends on the collective genetic make-up of these  
377 individuals (McGlothlin et al. 2010; Linksvayer 2006, 2015). Quantifying patterns of selection  
378 on group-level traits also has an added level of difficulty because the level of replication is the  
379 group (e.g., colony) and not the individual. Here, we begin to elucidate the genetic architecture  
380 underlying collective behavior and other group-level traits and to characterize how selection acts  
381 on these traits in a laboratory population of the ant *Monomorium pharaonis* that we created for  
382 this purpose. We provide evidence that variation in collective behaviors, including foraging,  
383 aggression, exploratory rate, group and colony exploration, and other group-level traits measured  
384 in the laboratory is heritable, phenotypically and genetically correlated, and shaped by selection.

385 We estimated the heritability of collective behaviors to be between 0.22 and 0.40, which  
386 was generally lower than the heritability estimates for body size (0.38 to 0.58), colony  
387 productivity (0.14 to 0.75), and caste (0.42) and sex ratio (0.49) (**Figure 2**, also see  
388 **Supplemental table 2** for heritability estimates using more complex pedigrees). These  
389 heritability estimates demonstrate that all of the phenotypes we measured, including collective  
390 behaviors, have the ability to respond to short term selection on standing genetic variation.  
391 Although numerous studies have examined the genetic architecture of group-level traits in honey  
392 bees (Rinderer et al. 1983; Collins et al. 1984; Milne 1985; Moritz et al. 1987; Bienefeld &

393 Pirchner 1990; Pirchner & Bienefeld 1991; Harris & Harbo 1999; Boecking et al. 2000; Hunt et  
394 al. 2007), this is one of the first studies to examine the genetic architecture or the evolution of  
395 collective behavior and other group-level traits in an ant species.

396         Although our heritability estimates are somewhat higher than other estimates of  
397 heritability across animal taxa (e.g. the heritability of individual-level behaviors was on average  
398 0.14; Dochtermann et al. 2015), heritability estimates can vary widely, and all-else-equal are  
399 expected to be higher in animals bred in captivity than in nature because environmental  
400 conditions in the laboratory are controlled (Simmons & Roff 1994). Furthermore, the heritability  
401 estimates for all of our measured group-level phenotypes may be higher than individual-level  
402 behaviors because the heritability of traits influenced by social interactions includes the  
403 contribution of heritable components of the social environment (Linksvayer 2006; Bijma et al.  
404 2007a, 2007b; Linksvayer et al. 2009; McGlothlin et al. 2010; Bijma 2011). There is ample  
405 empirical and theoretical evidence that this form of “hidden heritability” contributes to the  
406 heritable variation and also the evolutionary response to selection for social traits (Wade 1976;  
407 Moore 1990; Muir 2005; Linksvayer 2006; Bijma et al. 2007b; Bergsma et al. 2008; Wade et al.  
408 2010; Bijma 2011). Because we kept all components of the social environment intact across  
409 replicate sub-colonies of each colony genotype (i.e. the workers, queens and brood were all from  
410 the same parent colony), our heritability estimates do not partition out the relative contributions  
411 of variation in the workers’ own genomes from variation in the genomes of other colony  
412 members (Linksvayer 2006; Linksvayer et al. 2009).

413         We found evidence for both phenotypic and genetic correlations between collective  
414 behaviors. Suites of phenotypically correlated behaviors are termed “behavioral syndromes” and  
415 have been documented throughout the animal kingdom, including in social insects (Sih et al.

416 2004; Jandt et al. 2014). The behavioral syndrome we found in *M. pharaonis* consisted of a  
417 positive correlation between foraging and exploration, which were both negatively correlated  
418 with aggression. Our phenotypic and genetic correlation estimates were generally similar. For  
419 example, the four strongest genetic correlation estimates (Foraging - Aggression; Foraging -  
420 Forager coverage; Foraging - Colony coverage; Forager coverage - Colony coverage; **Figure 3**)  
421 were also four of the five significant phenotypic correlations and were all in the same direction.  
422 However, our genetic correlation estimates were generally very weak (i.e. not significantly  
423 different than zero) and only one of our genetic correlation estimates was bound away from zero  
424 (the correlation between foraging and colony exploration).

425 Traditionally, behavioral ecologists relied on the assumptions that all behavioral traits  
426 were heritable, not strongly genetically correlated, and thus free to evolve independently from  
427 other traits in response to patterns of selection on each trait. This approach was termed the  
428 “phenotypic gambit” (Grafen 1984). Our results generally support these assumptions as we  
429 found moderate estimates of heritability for all five behavioral variables and relatively weak  
430 genetic correlation estimates. These results suggest that collective behaviors are free to respond  
431 to selection, and that the underlying genetic architecture will not constrain long-term  
432 optimization by natural selection (Lynch & Walsh 1998; Wilson et al. 2010).

433 We calculated the strength and direction of selection acting on collective behavior and  
434 found evidence for both positive and negative linear selection (**Figure 4, Table 1**). The absolute  
435 value of our estimates of the strength of linear and quadratic selection are similar or slightly  
436 smaller than estimates of selection in wild populations (Kingsolver et al. 2001). The strongest  
437 pattern of linear selection we found was for foraging, indicating that colonies with higher  
438 foraging rates produced more reproductives as well as workers. A higher foraging rate is

439 presumably associated with higher input of resources for the colony, allowing colonies to be  
440 more productive.

441         We conducted the current study in a laboratory environment, which enabled us to strictly  
442 control the demographic make-up (i.e. queen number, worker number, etc.) and precise  
443 environmental conditions experienced by the three colony replicates for each of our 81 colony  
444 genotypes. Such control in particular is valuable given the complexity of social insect colonies  
445 (Linksvayer 2006; Kronauer & Libbrecht 2018). However, we also acknowledge the caveat that  
446 our choice to conduct our study in a controlled laboratory environment likely had strong effects  
447 on both our estimates of heritability and genetic correlations, as well as our estimates of the  
448 pattern and magnitude of selection. In particular, it is difficult to know how the fitness  
449 consequences of variation in collective behavior that we observed would change in a more  
450 natural setting. One possibility is that we might observe positive linear selection for aggression  
451 since aggression has no obvious benefit in the lab but may have benefits in nature. Laboratory-  
452 based estimates of natural selection are commonly used to test predictions of evolutionary theory  
453 (Fuller et al. 2005). For example, researchers used lab-based manipulations to test predictions of  
454 density-dependent selection theory in *Drosophila melanogaster* (e.g. Mueller 1997; Dasgupta et  
455 al. 2019). Our study provides some of the first evidence that natural selection can shape  
456 collective phenotypes, an assumption that is rarely tested, on a scale that is likely not feasible in  
457 a field study. Furthermore, because *M. pharaonis* tends to be found in association with humans,  
458 both in the tropics in their presumed native range (Wetterer 2010) and in heated buildings in  
459 introduced temperate regions, the laboratory conditions of our study might be more similar to the  
460 “natural” conditions experienced by our study species than other non-synanthropic species.

461 Overall, this study increases our understanding of the genetic architecture of collective  
462 behavior and demonstrates that it is strongly shaped by natural selection. Future studies should  
463 focus on identifying the mechanisms by which genes function to influence collective behavior  
464 and how variation in these genes affects patterns of variation for collective behavior within  
465 populations. Candidate gene approaches have been used successfully to demonstrate the roles of  
466 the ant ortholog of the *foraging* gene (Ingram et al. 2005; Lucas & Sokolowski 2009; Ingram et  
467 al. 2016; Bockoven et al. 2017; Page et al. 2018) and dopamine (Friedman et al. 2018). In  
468 addition to candidate gene approaches, future studies should utilize unbiased approaches such as  
469 quantitative trait locus (QTL) mapping in mapping populations (e.g., Hunt et al. 1998; 2007)  
470 such as ours, and association mapping in natural populations (e.g., Kocher et al. 2018).  
471 Additionally, future research should aim to understand the mechanisms underlying the  
472 expression of collective behavior (Friedman et al. 2019). For example, chemical communication  
473 (e.g. cuticular hydrocarbons, pheromones) likely plays a large role in regulating collective  
474 behavior in social insects. Finally, future studies should seek to disentangle the contribution of  
475 workers' own genomes and the composite sociogenome of their nestmates (including other  
476 workers, queens, and brood), by using cross-fostering approaches and experimentally setting up  
477 mixed worker groups (Morowitz & Southwick 1987; Calderone & Page 1992; Linksvayer 2006;  
478 Linksvayer et al. 2009; Gempe et al. 2012).

479

## 480 **Competing Interests**

481 We have no competing interests.

482

## 483 **References**

- 484 Adler, F. R., & Gordon, D. M. (1992). Information collection and spread by networks of  
485 patrolling ants. *The American Naturalist*, 140(3), 373-400.
- 486 Arnold, S. J. & Wade, M. J. 1984. On the measurement of natural and sexual selection: theory.  
487 *Evolution* 38: 709-719.
- 488 Banschbach, V. S. & Herbers, J. M. 1996. Complex colony structure in social insects: II.  
489 Reproduction, queen-worker conflict, and levels of selection. *Evolution* 50: 298-307.
- 490 Beekman, M., Sumpter, D. J. T. & Ratnieks, F. L. W. 2001. Phase transition between disordered  
491 and ordered foraging in Pharaoh's ants. *Proceedings of the National Academy of Sciences*  
492 98: 9703-9706.
- 493 Bengston, S. E. & Jandt, J. M. 2014b. The development of collective personality: the ontogenetic  
494 drivers of behavioral variation across groups. *Frontiers in Ecology and Evolution* 2.
- 495 Bergsma, R., Kanis, E., Knol, E. F. & Bijma, P. 2008. The contribution of social effects to  
496 heritable variation in finishing traits of domestic pigs (*Sus scrofa*). *Genetics* 178: 1559-  
497 1570.
- 498 Berndt, K.-P. & Eichler, W. 1987. Die Pharaoameise, *Monomorium pharaonis* (L.) (Hym.,  
499 Myrmicidae). *Mitteilungen aus dem Museum für Naturkunde in Berlin. Zoologisches*  
500 *Museum und Institut für Spezielle Zoologie (Berlin)* 63: 3-186.
- 501 Bienefeld, K., Ehrhardt, K. & Reinhardt, F. 2007. Genetic evaluation in the honey bee  
502 considering queen and worker effects—A BLUP-Animal Model approach. *Apidologie* 38:  
503 77-85.
- 504 Bienefeld, K. & Pirchner, F. 1990. Heritabilities for several colony traits in the honey bee (*Apis*  
505 *mellifera carnica*). *Apidologie* 21: 175-183.

- 506 Bijma, P. 2011. A general definition of the heritable variation that determines the potential of a  
507 population to respond to selection. *Genetics* 189: 1347-1359.
- 508 Bijma, P., Muir, W. M., Ellen, E. D., Wolf, J. B. & Van Arendonk, J. A. M. 2007a. Multilevel  
509 selection 2: Estimating the genetic parameters determining inheritance and response to  
510 selection. *Genetics* 175: 289.
- 511 Bijma, P., Muir, W. M. & Van Arendonk, J. A. M. 2007b. Multilevel selection 1: Quantitative  
512 genetics of inheritance and response to selection. *Genetics* 175: 277.
- 513 Blight, O., Albet Díaz-Mariblanca, G., Cerdá, X. & Boulay, R. 2016a. A proactive–reactive  
514 syndrome affects group success in an ant species. *Behavioral Ecology* 27: 118-125.
- 515 Blight, O., Villalta, I., Cerdá, X. & Boulay, R. 2016b. Personality traits are associated with  
516 colony productivity in the gypsy ant *Aphaenogaster senilis*. *Behavioral Ecology and*  
517 *Sociobiology* 70: 2203-2209.
- 518 Blum, M. S. (1996). Semiochemical parsimony in the Arthropoda. *Annual Review of*  
519 *Entomology*, 41(1), 353-374.
- 520 Bockoven, A. A., Coates, C. J. & Eubanks, M. D. 2017. Colony-level behavioural variation  
521 correlates with differences in expression of the foraging gene in red imported fire ants.  
522 *Molecular Ecology* 26: 5953-5960.
- 523 Boecking, O., Bienefeld, K. & Drescher, W. 2000. Heritability of the *Varroa*-specific hygienic  
524 behaviour in honey bees (Hymenoptera: Apidae). *Journal of Animal Breeding and*  
525 *Genetics* 117: 417-424.
- 526 Börger, L. & Fryxell, J. (2012) Quantifying individual differences in dispersal using net squared  
527 displacement. pp. 222-230.



- 528 Bourke, A. F. G. 2015. Sex investment ratios in eusocial Hymenoptera support inclusive fitness  
529 theory. *Journal of Evolutionary Biology* 28: 2106-2111.
- 530 Brascamp, E. W., Willam, A., Boigenzahn, C., Bijma, P. & Veerkamp, R. F. 2016. Heritabilities  
531 and genetic correlations for honey yield, gentleness, calmness and swarming behaviour in  
532 Austrian honey bees. *Apidologie* 47: 739-748.
- 533 Breed, M. D., Diaz, P. H. & Lucero, K. D. 2004. Olfactory information processing in honeybee,  
534 *Apis mellifera*, nestmate recognition. *Animal Behaviour* 68: 921-928.
- 535 Buczkowski, G., & Bennett, G. (2009). Colony budding and its effects on food allocation in the  
536 highly polygynous ant, *Monomorium pharaonis*. *Ethology*, 115(11), 1091-1099.
- 537 Calderone, N. W. & Page, R. E. 1992. Effects of interactions among genotypically diverse  
538 nestmates on task specialization by foraging honey bees (*Apis mellifera*). *Behavioral*  
539 *Ecology and Sociobiology* 30: 219-226.
- 540 Chandra, V., Fetter-Pruneda, I., Oxley, P. R., Ritger, A. L., McKenzie, S. K., Libbrecht, R. &  
541 Kronauer, D. J. C. 2018. Social regulation of insulin signaling and the evolution of  
542 eusociality in ants. *Science* 361: 398-402.
- 543 Collins, A. M., Rinderer, T. E., Harbo, J. R. & Brown, M. A. 1984. Heritabilities and  
544 correlations for several characters in the honey bee. *Journal of Heredity* 75: 135-140.
- 545 Dasgupta, P., Sarkar, S., Das, A. A., Verma, T., & Nandy, B. (2019). Intergenerational paternal  
546 effect of adult density in *Drosophila melanogaster*. *Ecology and Evolution*, 9(6), 3553-  
547 3563.
- 548 de Villemereuil, P. 2012. Tutorial estimation of a biological trait heritability using the animal  
549 model: How to use the MCMCglmm R package.

- 550 Dochtermann, N. A. & Dingemanse, N. J. 2013. Behavioral syndromes as evolutionary  
551 constraints. *Behavioral Ecology* 24: 806-811.
- 552 Dochtermann, N. A., Schwab, T. & Sih, A. 2015. The contribution of additive genetic variation  
553 to personality variation: heritability of personality. *Proc Biol Sci* 282: 20142201.
- 554 Dussutour, A. & Simpson, S. J. 2008. Description of a simple synthetic diet for studying  
555 nutritional responses in ants. *Insectes Sociaux* 55: 329-333.
- 556 Edwards, J. P. 1991. Caste regulation in the pharaohs ant *Monomorium pharaonis*- recognition  
557 and cannibalism of sexual brood by workers. *Physiological Entomology* 16: 263-271.
- 558 Evans, J. D. & Spivak, M. 2010. Socialized medicine: Individual and communal disease barriers  
559 in honey bees. *Journal of Invertebrate Pathology* 103: S62-S72.
- 560 Falconer, D. S. & Mackay, T. F. C. 1996. *Introduction to quantitative genetics*, 4th ed. Prentice  
561 Hall, Essex.
- 562 Fernández, P. C., Gil, M., & Farina, W. M. (2003). Reward rate and forager activation in  
563 honeybees: recruiting mechanisms and temporal distribution of arrivals. *Behavioral*  
564 *Ecology and Sociobiology*, 54(1), 80-87.
- 565 Fourcassie, V., & Deneubourg, J. L. (1994). The dynamics of collective exploration and trail-  
566 formation in *Monomorium pharaonis*: experiments and model. *Physiological*  
567 *Entomology*, 19(4), 291-300.
- 568 Franks, N., R., Dornhaus, A., Fitzsimmons, J., P. & Stevens, M. 2003. Speed versus accuracy in  
569 collective decision making. *Proceedings of the Royal Society of London. Series B:*  
570 *Biological Sciences* 270: 2457-2463.
- 571 Friedman, D. A. & Gordon, D. M. 2016. Ant genetics: reproductive physiology, worker  
572 morphology, and behavior. *Annual Review of Neuroscience* 39: 41-56.

- 573 Friedman, D. A., Pilko, A., Skowronska-Krawczyk, D., Krasinska, K., Parker, J. W., Hirsh, J. &  
574 Gordon, D. M. 2018. The role of dopamine in the collective regulation of foraging in  
575 harvester ants. *iScience* 8: 283-294.
- 576 Friedman, D. A., Johnson, B. R., & Linksvayer, T. A. (2019). Decentralized physiology and the  
577 molecular basis of social life in eusocial insects. *arXiv*, 1911.01321.
- 578 Fuller, R. C., Baer, C. F., & Travis, J. (2005). How and when selection experiments might  
579 actually be useful. *Integrative and Comparative Biology*, 45(3), 391-404.
- 580 Gempe, T., Stach, S., Bienefeld, K. & Beye, M. 2012. Mixing of honeybees with different  
581 genotypes affects individual worker behavior and transcription of genes in the neuronal  
582 substrate. *PLOS ONE* 7: e31653.
- 583 Gordon, D. M. 1991. Behavioral flexibility and the foraging ecology of seed-eating ants. *The*  
584 *American Naturalist* 138: 379-411.
- 585 Gordon, D. M. (2010). *Ant encounters: interaction networks and colony behavior* (Vol. 1):  
586 Princeton University Press.
- 587 Gordon, D. M. 2013. The rewards of restraint in the collective regulation of foraging by  
588 harvester ant colonies. *Nature* 498: 91.
- 589 Gordon, D. M. 2014. The ecology of collective behavior. *PLOS Biology* 12: e1001805.
- 590 Gordon, D. M. 2016. The evolution of the algorithms for collective behavior. *Cell Systems* 3:  
591 514-520.
- 592 Gordon, D. M. 2002. The regulation of foraging activity in red harvester ant colonies. *The*  
593 *American Naturalist* 159: 509-518.
- 594 Gordon, D. M., Guetz, A., Greene, M. J. & Holmes, S. 2011. Colony variation in the collective  
595 regulation of foraging by harvester ants. *Behavioral Ecology* 22: 429-435.

- 596 Gordon, D. M., Holmes, S. & Nacu, S. 2007. The short-term regulation of foraging in harvester  
597 ants. *Behavioral Ecology* 19: 217-222.
- 598 Gordon, D. M., & Mehdiabadi, N. J. (1999). Encounter rate and task allocation in harvester ants.  
599 *Behavioral Ecology and Sociobiology*, 45(5), 370-377.
- 600 Gospocic, J., Shields, E. J., Glastad, K. M., Lin, Y., Penick, C. A., Yan, H., Mikheyev, A. S.,  
601 Linksvayer, T. A., Garcia, B. A., Berger, S. L., Liebig, J., Reinberg, D. & Bonasio, R.  
602 2017. The neuropeptide corazonin controls social behavior and caste identity in ants. *Cell*  
603 170: 748-759.e12.
- 604 Grafen A. 1984. Natural selection, kin selection and group selection. In: Krebs JR,  
605 Davies NB, editors. *Behav Ecol*. 2nd ed. Oxford: Blackwell Scientific
- 606 Greene, M. J. & Gordon, D. M. 2007. Interaction rate informs harvester ant task decisions.  
607 *Behavioral Ecology* 18: 451-455.
- 608 Greenwood, A. K., Ardekani, R., McCann, S. R., Dubin, M. E., Sullivan, A., Bensussen, S.,  
609 Tavaré, S. & Peichel, C. L. 2015. Genetic mapping of natural variation in schooling  
610 tendency in the threespine stickleback. *G3: Genes/Genomes/Genetics* 5: 761-769.
- 611 Hadfield, J. D. 2010. MCMC methods for multi-response generalized linear mixed models: The  
612 MCMCglmm R package. *2010* 33: 22.
- 613 Hansen, C. & Spuhler, K. 1984. Development of the National Institutes of Health genetically  
614 heterogeneous rat stock. *Alcohol Clin Exp Res* 8: 477-9.
- 615 Harris, J. W. & Harbo, J. R. 1999. Heritability in honey bees (Hymenoptera: Apidae) of  
616 characteristics associated with resistance to *Varroa jacobsoni* (Mesostigmata: Varroidae).  
617 *Journal of Economic Entomology* 92: 261-265.

- 618 Hedrick, P. W. & Parker, J. D. 1997. Evolutionary genetics and genetic variation of  
619 haplodiploids and X-linked genes. *Annual Review of Ecology and Systematics* 28: 55-83.
- 620 Hunt, G. J., Amdam, G. V., Schlipalius, D., Emore, C., Sardesai, N., Williams, C. E., Rueppell,  
621 O., Guzmán-Novoa, E., Arechavaleta-Velasco, M., Chandra, S., Fondrk, M. K., Beye, M.  
622 & Page, R. E. 2007. Behavioral genomics of honeybee foraging and nest defense.  
623 *Naturwissenschaften* 94: 247-267.
- 624 Hunt, G. J., Guzmán-Novoa, E., Fondrk, M. K. & Page, R. E., Jr. 1998. Quantitative trait loci for  
625 honey bee stinging behavior and body size. *Genetics* 148: 1203-1213.
- 626 Ingram, K. K., Oefner, P. & Gordon, D. M. 2005. Task-specific expression of the foraging gene  
627 in harvester ants. *Molecular Ecology* 14: 813-818.
- 628 Ingram Krista, K., Gordon Deborah, M., Friedman Daniel, A., Greene, M., Kahler, J. & Peteru,  
629 S. 2016. Context-dependent expression of the foraging gene in field colonies of ants: the  
630 interacting roles of age, environment and task. *Proceedings of the Royal Society B:*  
631 *Biological Sciences* 283: 20160841.
- 632 Jackson, D. E., & Châline, N. (2007). Modulation of pheromone trail strength with food quality  
633 in Pharaoh's ant, *Monomorium pharaonis*. *Animal Behaviour*, 74(3), 463-470.
- 634 Jandt, J. M., Bengston, S., Pinter-Wollman, N., Pruitt, J. N., Raine, N. E., Dornhaus, A. & Sih,  
635 A. 2014. Behavioural syndromes and social insects: personality at multiple levels.  
636 *Biological Reviews* 89: 48-67.
- 637 Janzen, F. J. & Stern, H. S. 1998. Logistic regression for empirical studies of multivariate  
638 selection. *Evolution* 52: 1564-1571.

- 639 Jolles, J. W., Boogert, N. J., Sridhar, V. H., Couzin, I. D. & Manica, A. 2017. Consistent  
640 individual differences drive collective behavior and group functioning of schooling fish.  
641 *Current Biology* 27: 2862-2868.e7.
- 642 King, E. G., Merkes, C. M., McNeil, C. L., Hooper, S. R., Sen, S., Broman, K. W., Long, A. D.  
643 & Macdonald, S. J. 2012. Genetic dissection of a model complex trait using the  
644 *Drosophila* Synthetic Population Resource. *Genome Res* 22: 1558-66.
- 645 Kingsolver, J. G., Hoekstra, H. E., Hoekstra, J. M., Berrigan, D., Vignieri, S. N., Hill, C. E.,  
646 Hoang, A., Gibert, P. & Beerli, P. 2001. The strength of phenotypic selection in natural  
647 populations. *The American Naturalist* 157: 245-261.
- 648 Kleineidam, C. J., Heeb, E. L., & Neupert, S. (2017). Social interactions promote adaptive  
649 resource defense in ants. *PLOS ONE*, 12(9), e0183872.
- 650 Kocher, S. D., Mallarino, R., Rubin, B. E. R., Yu, D. W., Hoekstra, H. E. & Pierce, N. E. 2018.  
651 The genetic basis of a social polymorphism in halictid bees. *Nature Communications* 9:  
652 4338.
- 653 Krieger, M. J. 2005. To b or not to b: a pheromone-binding protein regulates colony social  
654 organization in fire ants. *Bioessays* 27: 91-9.
- 655 Kronauer, D. J. C. & Libbrecht, R. 2018. Back to the roots: the importance of using simple insect  
656 societies to understand the molecular basis of complex social life. *Current Opinion in*  
657 *Insect Science* 28: 33-39.
- 658 Kruuk, L. E. B. 2004. Estimating genetic parameters in natural populations using the "animal  
659 model". *Philosophical transactions of the Royal Society of London. Series B, Biological*  
660 *sciences* 359: 873-890.

- 661 Lande, R. & Arnold, S. J. 1983. The measurement of selection on correlated characters.  
662 *Evolution* 37: 1210-1226.
- 663 Linksvayer, T. A. 2006. Direct, maternal, and sibsocial genetic effects on individual and colony  
664 traits in an ant. *Evolution* 60: 2552-2561.
- 665 Linksvayer, T. A. 2008. Queen–worker–brood coadaptation rather than conflict may drive  
666 colony resource allocation in the ant *Temnothorax curvispinosus*. *Behavioral Ecology*  
667 *and Sociobiology*, 62(5), 647-657. doi: 10.1007/s00265-007-0489-9
- 668 Linksvayer, T. A. 2015. The Molecular and Evolutionary Genetic Implications of Being Truly  
669 Social for the Social Insects. In: *Genomics, Physiology and Behaviour of Social Insects*,  
670 Vol. 48 (Zayed, A. & Kent, C. F., eds.). pp. 271-292 *Advances in Insect Physiology*.  
671 Academic Press Ltd-Elsevier Science Ltd, London.
- 672 Linksvayer, T. A., Fondrk, M. K. & Page Jr, R. E. 2009. Honeybee social regulatory networks  
673 are shaped by colony-level selection. *The American Naturalist* 173: E99-E107.
- 674 Löfqvist, J. (1976). Formic acid and saturated hydrocarbons as alarm pheromones for the ant  
675 *Formica rufa*. *Journal of Insect Physiology*, 22(10), 1331-1346.
- 676 Lucas, C. & Sokolowski, M. B. 2009. Molecular basis for changes in behavioral state in ant  
677 social behaviors. *Proceedings of the National Academy of Sciences* 106: 6351-6356.
- 678 Lynch, M. & Walsh, B. 1998. *Genetics and analysis of quantitative traits*. Sinauer.
- 679 McGlothlin, J. W., Moore, A. J., Wolf, J. B. & Brodie III, E. D. 2010. Interacting phenotypes  
680 and the evolutionary process. III. Social evolution. *Evolution* 64: 2558-2574.
- 681 Mehdiabadi, N. J., Reeve, H. K. & Mueller, U. G. 2003. Queens versus workers: sex-ratio  
682 conflict in eusocial Hymenoptera. *Trends in Ecology & Evolution* 18: 88-93.

- 683 Milne, C. P., Jr. 1985. Estimates of the heritabilities of and genetic correlation between two  
684 components of honey bee (Hymenoptera: Apidae) hygienic behavior: uncapping and  
685 removing. *Annals of the Entomological Society of America* 78: 841-844.
- 686 Modlmeier, A. P., Liebmann, J. E. & Foitzik, S. 2012. Diverse societies are more productive: a  
687 lesson from ants. *Proceedings of the Royal Society B: Biological Sciences* 279: 2142-  
688 2150.
- 689 Möglich, M. 1978. Social organization of nest emigration in *Leptothorax* (Hym., Form.).  
690 *Insectes Sociaux* 25: 205-225.
- 691 Moore, A. J. 1990. The inheritance of social dominance, mating behaviour and attractiveness to  
692 mates in male *Nauphoeta cinerea*. *Animal Behaviour* 39: 388-397.
- 693 Moore, A. J., Brodie Iii, E. D. & Wolf, J. B. 1997. Interacting phenotypes and the evolutionary  
694 process: I. Direct and indirect genetic effects of social interactions. *Evolution* 51: 1352-  
695 1362.
- 696 Moritz, R. F. A. 1989. Colony Level and within colony level selection in honeybees: A two  
697 allele population model for *Apis mellifera capensis*. *Behavioral Ecology and*  
698 *Sociobiology* 25: 437-444.
- 699 Moritz, R. F. A. & Southwick, E. E. 1987. Phenotype interactions in group behavior of honey  
700 bee workers (*Apis mellifera* L.). *Behavioral Ecology and Sociobiology* 21: 53-57.
- 701 Moritz, R. F. A., Southwick, E. E. & Harbo, J. B. 1987. Genetic analysis of defensive behavior  
702 of honeybee colonies (*Apis mellifera* L.) in a field test. *Apidologie* 18: 27-42.
- 703 Morrissey, M. B. & Sakrejda, K. 2013. Unification of regression-based methods for the analysis  
704 of natural selection. *Evolution* 67: 2094-2100.



- 705 Mott, R., Talbot, C. J., Turri, M. G., Collins, A. C. & Flint, J. 2000. A method for fine mapping  
706 quantitative trait loci in outbred animal stocks. *Proceedings of the National Academy of*  
707 *Sciences* 97: 12649-12654.
- 708 Mueller, L. D. (1997). Theoretical and empirical examination of density-dependent selection.  
709 *Annual Review of Ecology and Systematics*, 28(1), 269-288.
- 710 Muir, W. M. 2005. Incorporation of competitive effects in forest tree or animal breeding  
711 programs. *Genetics* 170: 1247-59.
- 712 Owen, R. E. 1986. Colony-level selection in the social insects: Single locus additive and  
713 nonadditive models. *Theoretical Population Biology* 29: 198-234.
- 714 Page, H., Sweeney, A., Pilko, A. & Pinter-Wollman, N. 2018. Underlying mechanisms and  
715 ecological context of variation in exploratory behavior of the Argentine ant, *Linepithema*  
716 *humile*. *The Journal of Experimental Biology* 221: jeb188722.
- 717 Pinter-Wollman, N., Bala, A., Merrell, A., Queirolo, J., Stumpe, M. C., Holmes, S., & Gordon,  
718 D. M. (2013). Harvester ants use interactions to regulate forager activation and  
719 availability. *Animal Behaviour*, 86(1), 197-207.
- 720 Pirchner, F. & Bienefeld, K. 1991. Genetic correlations among several colony characters in the  
721 honey bee (Hymenoptera: Apidae) taking queen and worker effects into account. *Annals*  
722 *of the Entomological Society of America* 84: 324-331.
- 723 Planas-Sitjà, I., Deneubourg, J.-L., Gibon, C. & Sempo, G. 2015. Group personality during  
724 collective decision-making: a multi-level approach. *Proceedings of the Royal Society B:*  
725 *Biological Sciences* 282: 20142515.

- 726 Pontieri, L., Schmidt, A. M., Singh, R., Pedersen, J. S. & Linksvayer, T. A. 2017. Artificial  
727 selection on ant female caste ratio uncovers a link between female-biased sex ratios and  
728 infection by *Wolbachia* endosymbionts. *Journal of Evolutionary Biology* 30: 225-234.
- 729 Pratt, S. C. (2017) Nest site choice in social insects. *Encyclopedia of Animal Behavior*. 2: 534 –  
730 540.
- 731 R Core Team. 2014. R: a language and environment for statistical computing. R  
732 Foundation for Statistical Computing, Vienna, Austria. <http://www.R-project.org/>.
- 733 Ratnieks, F. L. W. & Reeve, H. K. 1992. Conflict in single-queen hymenopteran societies: the  
734 structure of conflict and processes that reduce conflict in advanced eusocial species.  
735 *Journal of Theoretical Biology* 158: 33-65.
- 736 Reuter, M. & Keller, L. 2001. Sex ratio conflict and worker production in eusocial Hymenoptera.  
737 *The American Naturalist* 158: 166-177.
- 738 Rinderer, T. E., Collins, A. M. & Brown, M. A. 1983. Heritabilities and correlations of the honey  
739 bee: response to *Nosema apis*, longevity, and alarm response to isopentyl acetate.  
740 *Apidologie* 14: 79-85.
- 741 Robinson, E. J. H., Jackson, D. E., Holcombe, M. & Ratnieks, F. L. W. 2005. ‘No entry’ signal  
742 in ant foraging. *Nature* 438: 442.
- 743 Schmidt, A. M. (2010). *The invasion biology and sociogenetics of pharaoh ants*. Museum  
744 Tusculanum.
- 745 Schmidt, A. M., d'Ettorre, P. & Pedersen, J. S. 2010. Low levels of nestmate discrimination  
746 despite high genetic differentiation in the invasive pharaoh ant. *Frontiers in Zoology* 7:  
747 20.

- 748 Sih, A., Bell, A. & Johnson, J. C. 2004. Behavioral syndromes: an ecological and evolutionary  
749 overview. *Trends in Ecology & Evolution* 19: 372-378.
- 750 Simons, A. M. & Roff, D. A. 1994. The effect of environmental variability on the heritabilities  
751 of traits of a field cricket. *Evolution* 48: 1637-1649.
- 752 Smith, B. R. & Blumstein, D. T. 2008. Fitness consequences of personality: a meta-analysis.  
753 *Behavioral Ecology* 19: 448-455.
- 754 Spivak, M. 1996. Honey bee hygienic behavior and defense against *Varroa jacobsoni*.  
755 *Apidologie* 27: 245-260.
- 756 Sumpter, D. J. T. & Beekman, M. 2003. From nonlinearity to optimality: pheromone trail  
757 foraging by ants. *Animal Behaviour* 66: 273-280.
- 758 Tang, W., Zhang, G., Serluca, F., Li, J., Xiong, X., Coble, M., Tsai, T., Li, Z., Molind, G., Zhu,  
759 P. & Fishman, M. C. 2018. Genetic architecture of collective behaviors in zebrafish.  
760 *bioRxiv*: 350314.
- 761 Tarpy, D. R., Gilley, D. C. & Seeley, T. D. 2004. Levels of selection in a social insect: A review  
762 of conflict and cooperation during honey bee (*Apis mellifera*) queen replacement.  
763 *Behavioral Ecology and Sociobiology* 55: 513-523.
- 764 Trivers, R. L. & Hare, H. 1976. Haplodiploidy and the evolution of the social insect. *Science*  
765 191: 249-63.
- 766 Tsuji, K. 1994. Inter-colonial selection for the maintenance of cooperative breeding in the ant  
767 *Pristomyrmex pungens*: a laboratory experiment. *Behavioral Ecology and Sociobiology*  
768 35: 109-113.

- 769 Tsuji, K. 1995. Reproductive Conflicts and Levels of Selection in the Ant *Pristomyrmex*  
770 *pungens*: Contextual Analysis and Partitioning of Covariance. *The American Naturalist*  
771 146: 586-607.
- 772 Valdar, W., Solberg, L. C., Gauguier, D., Burnett, S., Klenerman, P., Cookson, W. O., Taylor,  
773 M. S., Rawlins, J. N., Mott, R. & Flint, J. 2006. Genome-wide genetic association of  
774 complex traits in heterogeneous stock mice. *Nat Genet* 38: 879-87.
- 775 van Oers, K., de Jong, G., van Noordwijk, A. J., Kempenaers, B. & Drent, P. J. 2005.  
776 Contribution of Genetics to the Study of Animal Personalities: A Review of Case Studies.  
777 *Behaviour* 142: 1185-1206.
- 778 Wade, M. J. 1976. Group selections among laboratory populations of *Tribolium*. *Proc Natl Acad*  
779 *Sci U S A* 73: 4604-7.
- 780 Wade, M. J., Bijma, P., Ellen, E. D. & Muir, W. 2010. Group selection and social evolution in  
781 domesticated animals. *Evolutionary applications* 3: 453-465.
- 782 Walsh, J. T., Warner, M. R., Kase, A., Cushing, B. J. & Linksvayer, T. A. 2018. Ant nurse  
783 workers exhibit behavioural and transcriptomic signatures of specialization on larval  
784 stage. *Animal Behaviour* 141: 161-169.
- 785 Wang, J., Ross, K. G. & Keller, L. 2008. Genome-wide expression patterns and the genetic  
786 architecture of a fundamental social trait. *PLOS Genetics* 4: e1000127.
- 787 Wang, J., Wurm, Y., Nipitwattanaphon, M., Riba-Grognuz, O., Huang, Y.-C., Shoemaker, D. &  
788 Keller, L. 2013. A Y-like social chromosome causes alternative colony organization in  
789 fire ants. *Nature* 493: 664.

- 790 Wark, A. R., Greenwood, A. K., Taylor, E. M., Yoshida, K. & Peichel, C. L. 2011. Heritable  
791 differences in schooling behavior among threespine stickleback populations revealed by a  
792 novel assay. *PLOS ONE* 6: e18316.
- 793 Warner, M. R., Lipponen, J. & Linksvayer, T. A. 2018. Pharaoh ant colonies dynamically  
794 regulate reproductive allocation based on colony demography. *Behavioral Ecology and*  
795 *Sociobiology* 72: 31.
- 796 Warner, M. R., Mikheyev, A. S. & Linksvayer, T. A. 2017. Genomic signature of kin selection  
797 in an ant with obligately sterile workers. *Molecular Biology and Evolution* 34: 1780-  
798 1787.
- 799 Wetterer, J. 2010. Worldwide spread of the pharaoh ant, *Monomorium pharaonis* (Hymenoptera:  
800 Formicidae).
- 801 Wilson, A. J., Reale, D., Clements, M. N., Morrissey, M. M., Postma, E., Walling, C. A., Kruuk,  
802 L. E. & Nussey, D. H. 2010. An ecologist's guide to the animal model. *J Anim Ecol* 79:  
803 13-26.
- 804 Wray, M. K., Mattila, H. R. & Seeley, T. D. 2011. Collective personalities in honeybee colonies  
805 are linked to colony fitness. *Animal Behaviour* 81: 559-568.
- 806 Wright, C. M., Lichtenstein, J. L. L., Doering, G. N., Pretorius, J., Meunier, J. & Pruitt, J. N.  
807 2019. Collective personalities: present knowledge and new frontiers. *Behavioral Ecology*  
808 *and Sociobiology* 73: 31.
- 809
- 810

811 **Table 1. Linear and quadratic selection estimates for behaviors using either reproductive**  
 812 **(R) or worker (W) production as the measurement of fitness.**

| Trait              | Estimate<br>(R) | SE    | p      | Estimate<br>(W) | SE    | p     |
|--------------------|-----------------|-------|--------|-----------------|-------|-------|
| <b>Linear</b>      |                 |       |        |                 |       |       |
| Foraging           | 0.245           | 0.071 | <0.001 | 0.122           | 0.047 | 0.008 |
| Aggression         | -0.054          | 0.070 | 0.446  | 0.007           | 0.048 | 0.916 |
| Exploratory rate   | -0.088          | 0.052 | 0.048  | -0.022          | 0.041 | 0.586 |
| Group exploration  | -0.033          | 0.051 | 0.498  | 0.027           | 0.047 | 0.788 |
| Colony exploration | -0.014          | 0.063 | 0.810  | 0.015           | 0.049 | 0.788 |
| <b>Quadratic</b>   |                 |       |        |                 |       |       |
| Foraging           | 0.025           | 0.059 | 0.576  | 0.019           | 0.022 | 0.130 |
| Aggression         | 0.003           | 0.010 | 0.248  | 0.00005         | 0.049 | 0.412 |
| Exploratory rate   | 0.008           | 0.010 | 0.106  | 0.050           | 0.051 | 0.206 |
| Group exploration  | 0.001           | 0.005 | 0.258  | 0.085           | 0.078 | 0.116 |
| Colony exploration | 0.0002          | 0.006 | 0.306  | 0.0002          | 0.004 | 0.266 |

813

814

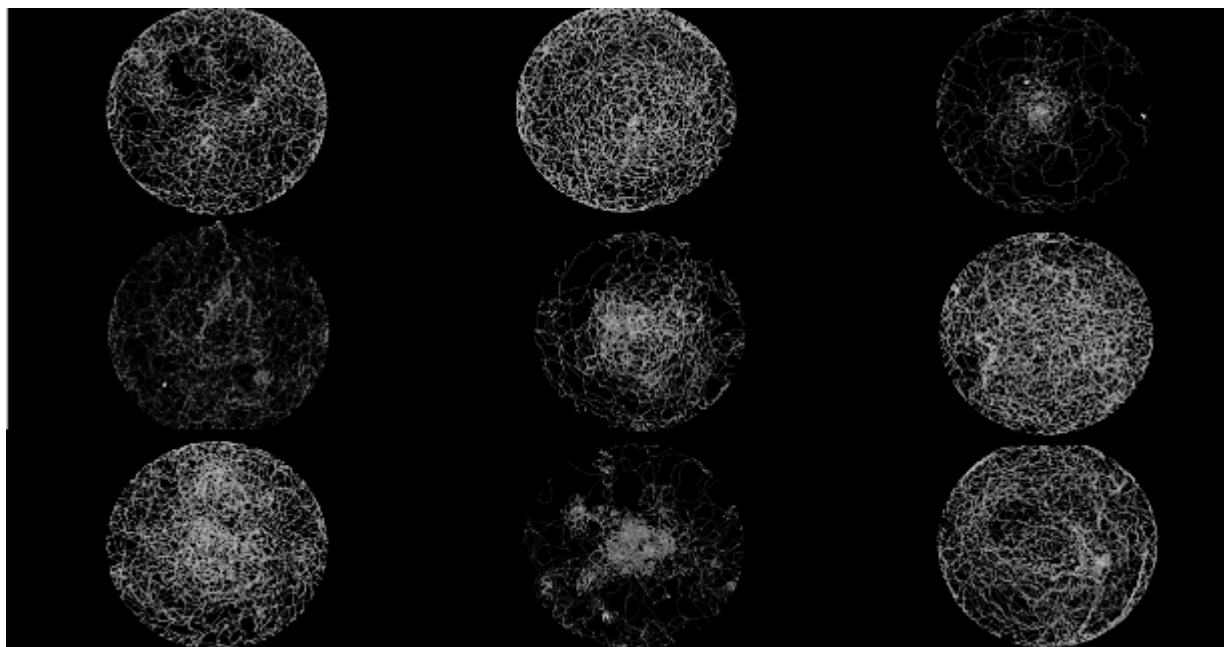

815

816 **Figure 1.** Nine representative plots showing variation among colony genotypes in the  
817 exploratory patterns of groups of five foragers. The plots show the tracks (white pixels) of the  
818 ants as they explore a novel arena.

819

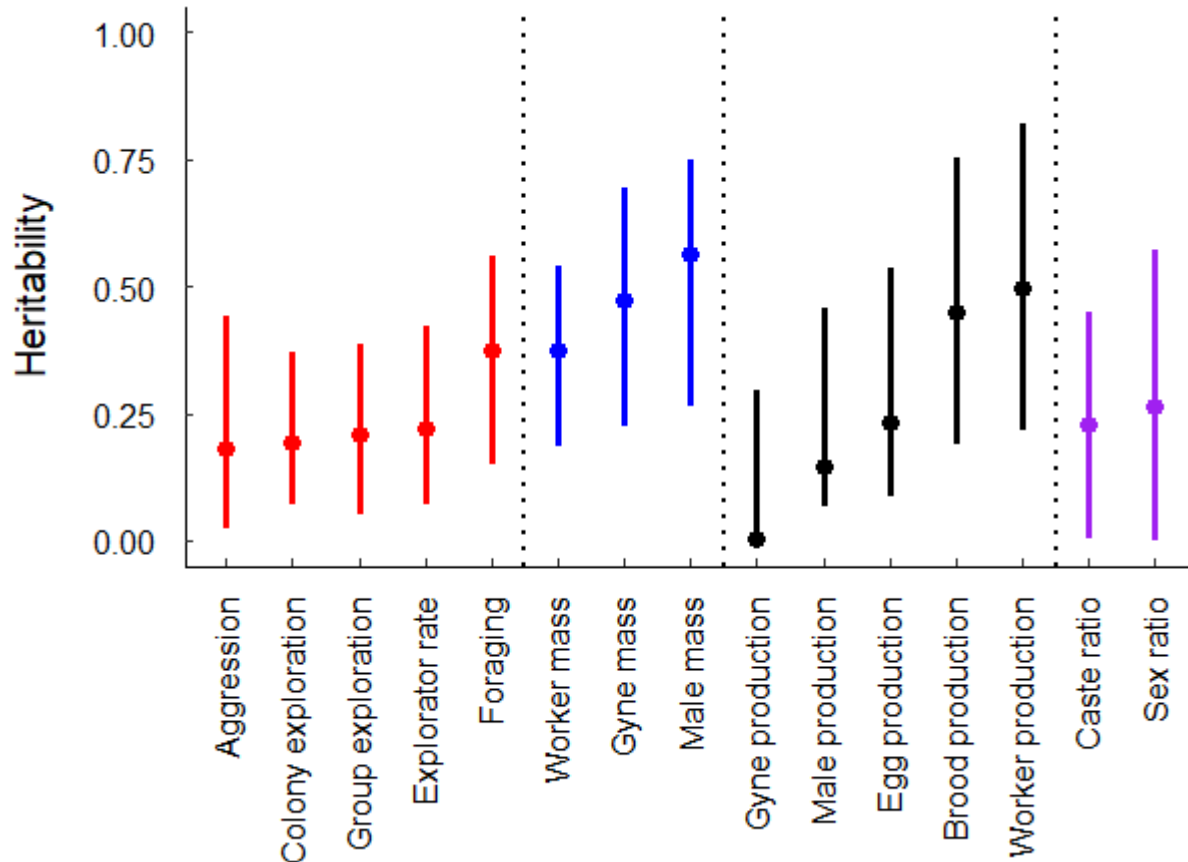

820

821 **Figure 2.** Caterpillar plot of heritability estimates +/- 95% confidence intervals grouped by  
822 category. Collective behaviors (red), body mass (blue), colony productivity (black), and caste  
823 and sex ratio (purple) are designated by different colors.

824



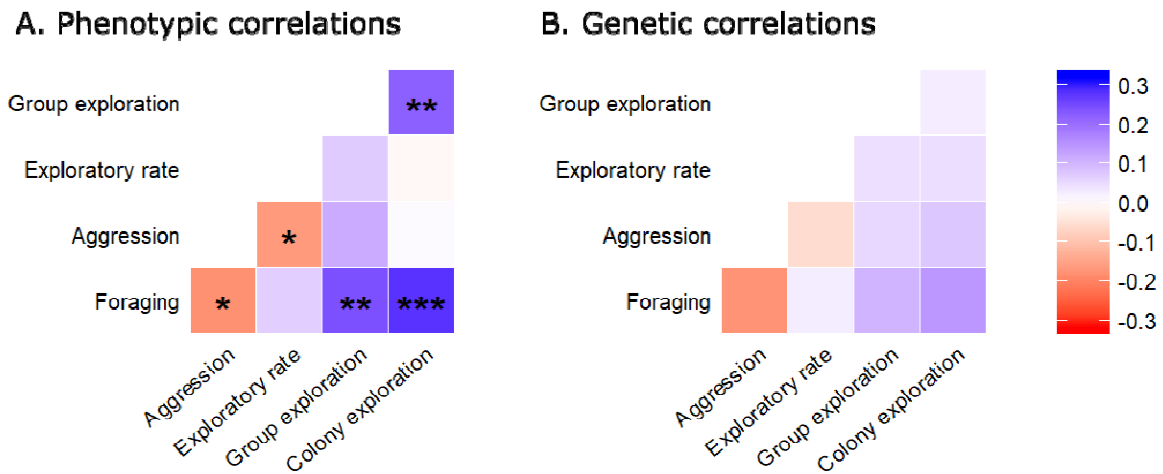

825

826 **Figure 3.** Heatmaps showing phenotypic (A) and genetic (B) correlations between collective  
827 behaviors. For the phenotypic correlations, asterisks within cells correspond to p values (adjusted  
828 for multiple comparisons;  $p < 0.05 = *$ ;  $p < 0.01 = **$ ;  $p < 0.001 = ***$ ; no symbol indicates  $p >$   
829  $0.05$ ) and the colors correspond to the magnitude and sign of the Spearman rank correlation  
830 coefficient. None of the genetic correlations were significant (all 95% CIs overlapped with zero).

831

832

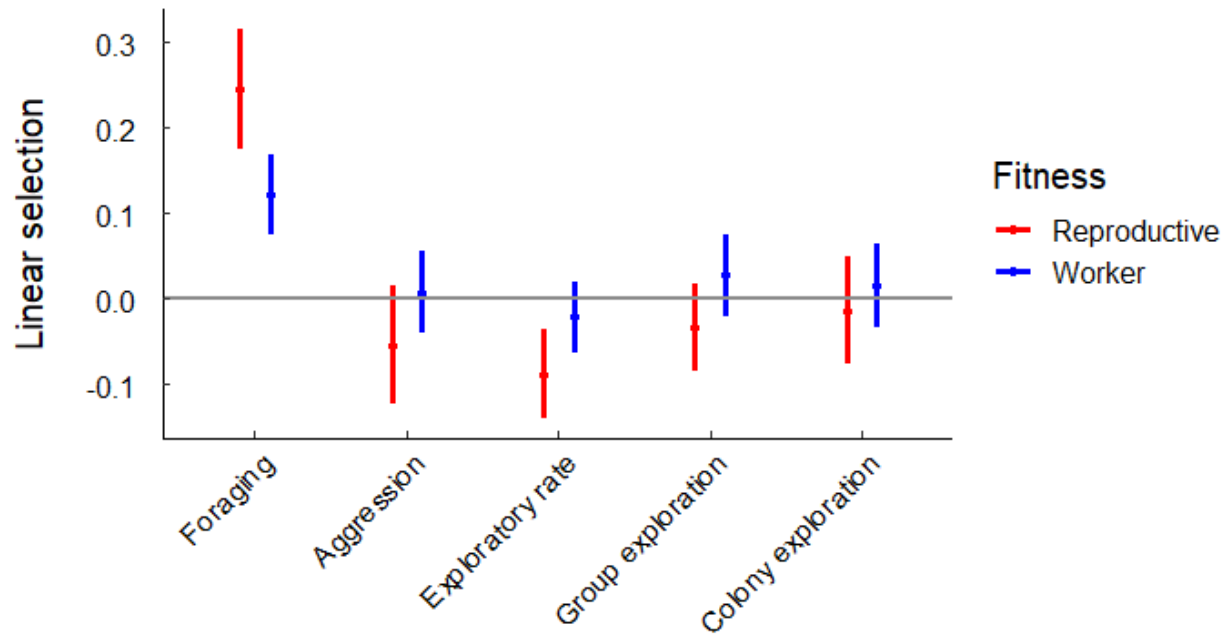

833 **Figure 4.** Caterpillar plot showing linear (a) and quadratic (b) selection gradients +/- SE.  
834  
835 Asterisks indicate estimates that are significant. Positive values indicate directional selection for  
836 increased trait values (e.g., there is directional selection for increased foraging rate when fitness  
837 is measured by the number of reproductives or workers produced) and negative values indicate  
838 directional selection for decreased trait values (e.g., there is directional selection for decreased  
839 exploratory rate when fitness is measured as the number of reproductives produced).

840

841

842
